# Supplementary material
Source: publisher site journal article supplement (https://www.dovepress.com/article/241795)
Supplement: Supplementary file 1 [file get_supplementary_file.php]

**[Supplementary Table 1](https://www.ncbi.nlm.nih.gov/pmc/articles/PMC5482608/" \l "SD2). Differentially expressed miRNAs between gastric cancer and adjacent normal tissues.**

|  | Upregulated miRNAs | | | |  | |  |  | Upregulated miRNAs | | | |  |
| --- | --- | --- | --- | --- | --- | --- | --- | --- | --- | --- | --- | --- | --- |
| miRNAs | | | P-value | logFC | | |  | miRNAs | | P-value | | logFC | |
| hsa-miR-199a-3p | | | 7.08E-05 | 2.15675 | | |  | hsa-miR-4262 | | 2.72E-07 | | 1.29615 | |
| hsa-miR-125b-5p | | | 2.98E-05 | 1.98925 | | |  | hsa-miR-93-5p | | 1.12E-07 | | 1.2741 | |
| hsa-miR-199a-5p | | | 7.61E-07 | 1.9549 | | |  | hsa-miR-140-5p | | 2.77E-03 | | 1.25455 | |
| hsa-miR-223-3p | | | 7.46E-06 | 1.88165 | | |  | hsa-miR-193a-3p | | 7.51E-05 | | 1.2192 | |
| hsa-miR-196a-5p | | | 3.21E-07 | 1.84665 | | |  | hsa-miR-374c-5p | | 5.12E-04 | | 1.20905 | |
| hsa-miR-27a-3p | | | 1.11E-04 | 1.82315 | | |  | hsa-miR-181b-5p | | 4.19E-11 | | 1.20595 | |
| hsa-miR-23b-3p | | | 4.69E-05 | 1.7481 | | |  | hsa-miR-4791 | | 1.39E-05 | | 1.1992 | |
| hsa-miR-21-5p | | | 1.35E-05 | 1.74065 | | |  | hsa-miR-16-5p | | 2.40E-02 | | 1.19915 | |
| hsa-miR-100-5p | | | 1.96E-04 | 1.7058 | | |  | hsa-miR-18b-5p | | 1.23E-05 | | 1.1835 | |
| hsa-miR-20a-5p | | | 1.02E-04 | 1.6848 | | |  | hsa-let-7d-5p | | 4.58E-04 | | 1.1829 | |
| hsa-miR-23a-3p | | | 5.12E-10 | 1.6759 | | |  | hsa-miR-28-5p | | 7.13E-05 | | 1.1807 | |
| hsa-miR-1 | | | 2.69E-03 | 1.6699 | | |  | hsa-miR-331-3p | | 1.73E-09 | | 1.17655 | |
| hsa-miR-214-3p | | | 1.22E-08 | 1.6432 | | |  | hsa-miR-218-5p | | 4.84E-04 | | 1.1708 | |
| hsa-miR-10a-5p | | | 2.32E-05 | 1.6371 | | |  | hsa-let-7g-5p | | 5.54E-03 | | 1.16625 | |
| hsa-miR-135b-5p | | | 1.03E-05 | 1.6218 | | |  | hsa-miR-26b-5p | | 2.40E-02 | | 1.16125 | |
| hsa-miR-99a-5p | | | 1.11E-03 | 1.60425 | | |  | hsa-miR-335-5p | | 6.89E-06 | | 1.161 | |
| hsa-miR-20b-5p | | | 3.64E-04 | 1.5978 | | |  | hsa-miR-18a-5p | | 7.94E-06 | | 1.1581 | |
| hsa-miR-199b-5p | | | 2.90E-04 | 1.58665 | | |  | hsa-miR-92a-3p | | 8.67E-08 | | 1.1539 | |
| hsa-miR-10b-5p | | | 1.82E-05 | 1.5553 | | |  | hsa-miR-181a-5p | | 1.02E-09 | | 1.15225 | |
| hsa-miR-27b-3p | | | 1.94E-05 | 1.5312 | | |  | hsa-miR-301a-3p | | 1.36E-05 | | 1.13955 | |
| hsa-miR-126-3p | | | 4.07E-03 | 1.51835 | | |  | hsa-miR-455-3p | | 7.10E-06 | | 1.13355 | |
| hsa-miR-130a-3p | | | 4.41E-04 | 1.51825 | | |  | hsa-let-7i-3p | | 4.09E-06 | | 1.1308 | |
| hsa-miR-142-3p | | | 2.66E-03 | 1.5088 | | |  | hsa-miR-642b-3p | | 1.09E-04 | | 1.1205 | |
| hsa-miR-4291 | | | 1.12E-09 | 1.49555 | | |  | hsa-miR-4797-5p | | 4.77E-06 | | 1.12 | |
| hsa-miR-24-3p | | | 6.12E-06 | 1.4939 | | |  | hsa-miR-708-5p | | 6.78E-05 | | 1.1161 | |
| hsa-let-7a-5p | | | 5.89E-03 | 1.48995 | | |  | hsa-miR-15a-5p | | 2.28E-03 | | 1.10745 | |
| hsa-miR-145-5p | | | 6.59E-04 | 1.483 | | |  | hsa-miR-1297 | | 1.13E-02 | | 1.10515 | |
| hsa-miR-17-5p | | | 3.83E-05 | 1.48005 | | |  | hsa-miR-19a-3p | | 6.76E-04 | | 1.0951 | |
| hsa-miR-143-5p | | | 6.05E-05 | 1.47935 | | |  | hsa-miR-151a-5p | | 6.59E-05 | | 1.0909 | |
| hsa-let-7f-5p | | | 1.36E-03 | 1.47695 | | |  | hsa-miR-103a-3p | | 1.09E-05 | | 1.0812 | |
| hsa-miR-4328 | | | 1.28E-03 | 1.45485 | | |  | hsa-miR-127-3p | | 7.01E-06 | | 1.0754 | |
| hsa-miR-4324 | | | 3.90E-05 | 1.42875 | | |  | hsa-miR-99b-5p | | 1.58E-05 | | 1.0711 | |
| hsa-miR-145-3p | | | 3.88E-04 | 1.4278 | | |  | hsa-miR-377-3p | | 2.18E-05 | | 1.0685 | |
| hsa-miR-143-3p | | | 6.39E-03 | 1.4245 | | |  | hsa-miR-21-3p | | 2.71E-07 | | 1.0627 | |
| hsa-miR-95 | | | 1.06E-04 | 1.42215 | | |  | hsa-miR-3175 | | 6.68E-07 | | 1.0534 | |
| hsa-miR-196b-5p | | | 1.61E-06 | 1.3817 | | |  | hsa-miR-133a | | 3.44E-03 | | 1.0509 | |
| hsa-miR-23c | | | 9.50E-06 | 1.37485 | | |  | hsa-miR-4770 | | 1.02E-04 | | 1.04695 | |
| hsa-miR-98-5p | | | 5.44E-04 | 1.3647 | | |  | hsa-miR-342-3p | | 4.90E-04 | | 1.0393 | |
| hsa-miR-106a-5p | | | 1.36E-05 | 1.3585 | | |  | hsa-miR-106b-5p | | 1.43E-05 | | 1.03365 | |
| hsa-miR-126-5p | | | 2.83E-03 | 1.35535 | | |  | hsa-let-7a-3p | | 2.40E-05 | | 1.0297 | |
| hsa-let-7i-5p | | | 5.99E-06 | 1.35135 | | |  | hsa-miR-181d | | 1.45E-08 | | 1.02855 | |
| hsa-miR-374a-5p | | | 4.63E-03 | 1.3449 | | |  | hsa-miR-151a-5p | | 7.34E-05 | | 1.0133 | |
| hsa-miR-4284 | | | 1.05E-02 | 1.34255 | | |  | hsa-miR-32-5p | | 5.89E-03 | | 1.01255 | |
| hsa-miR-214-5p | | | 3.88E-07 | 1.34045 | | |  | hsa-miR-454-3p | | 2.36E-05 | | 1.0083 | |
| hsa-miR-4317 | | | 1.79E-06 | 1.3077 | | |  | hsa-miR-374b-5p | | 7.94E-04 | | 1.00765 | |
| hsa-miR-195-5p | | | 1.52E-02 | 1.2995 | | |  |  | |  | |  | |
|  | | Downregulated miRNAs | | | |  |  |  | Downregulated miRNAs | | | |  |
| miRNAs | | | P-value | logFC | | |  | miRNAs | | P-value | | logFC | |
| hsa-miR-652-5p | | | 1.34E-04 | -1.0006 | | |  | hsa-miR-4268 | | 9.13E-11 | | -1.2915 | |
| hsa-miR-1269b | | | 1.13E-09 | -1.01665 | | |  | hsa-miR-891a | | 7.27E-10 | | -1.2999 | |
| hsa-miR-665 | | | 2.86E-06 | -1.04775 | | |  | hsa-miR-4795-3p | | 3.07E-05 | | -1.32 | |
| hsa-miR-375 | | | 3.30E-03 | -1.06525 | | |  | hsa-miR-1298 | | 2.99E-06 | | -1.3332 | |
| hsa-miR-4501 | | | 1.64E-06 | -1.06575 | | |  | hsa-miR-660-3p | | 1.74E-08 | | -1.34425 | |
| hsa-miR-4279 | | | 1.94E-10 | -1.08415 | | |  | hsa-miR-4661-5p | | 9.18E-08 | | -1.37635 | |
| hsa-miR-943 | | | 2.45E-05 | -1.09755 | | |  | hsa-miR-4539 | | 2.36E-09 | | -1.4428 | |
| hsa-miR-148a-3p | | | 1.52E-05 | -1.1978 | | |  | hsa-let-7d-3p | | 1.10E-08 | | -1.5582 | |
| hsa-miR-1275 | | | 3.48E-04 | -1.20965 | | |  | hsa-miR-4636 | | 1.93E-06 | | -1.6101 | |
| hsa-miR-4290 | | | 8.88E-11 | -1.2741 | | |  |  | |  |  | | |
